# Supplementary material for: Low Sodium Intake, Low Protein Intake, and Excess Mortality in an Older Dutch General Population Cohort: Findings in the Prospective Lifelines-MINUTHE Study
Source: MDPI journal article supplement (doi:10.3390/nu15020428), 2023-01-13
Supplement: s1 [file s1]

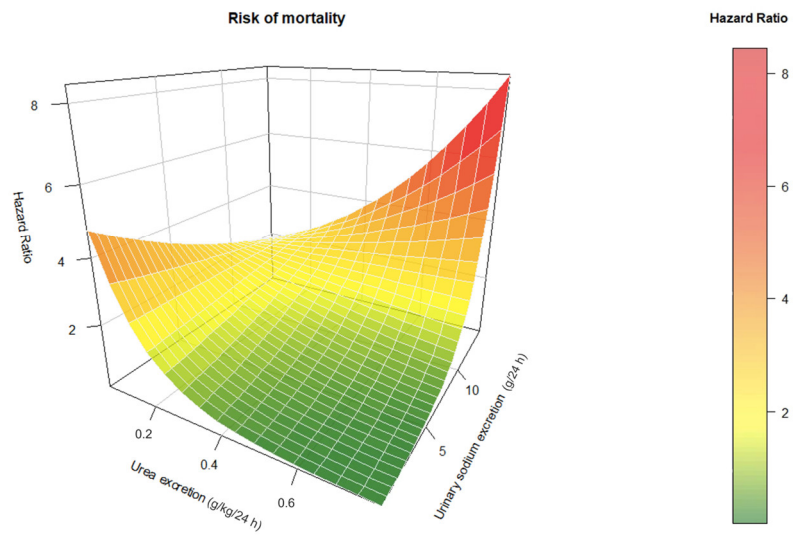

**Figure S1.** Joint association of 24 h sodium intake and urea excretion with all-cause mortality.

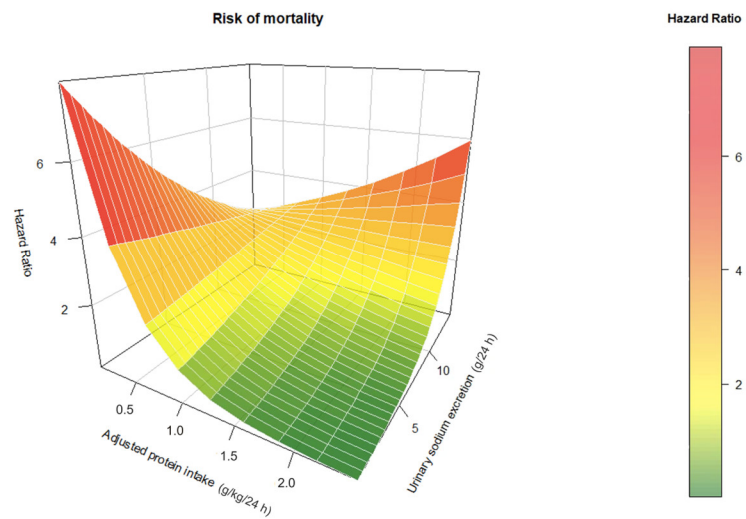

**Figure S2.** Joint association of 24 h sodium intake and BMI adjusted protein intake with all-cause mortality. Abbreviation: BMI, body mass index.
